# Supplementary material for: What causes tumbling of altro-α-CD derivatives? Insight from computer simulations
Source: Royal Society of Chemistry journal article supplement (doi:10.1039/c5ra05642j), 2015-01-01
Supplement: c5ra05642j2.pdf [file c5ra05642j2.pdf]

## Electronic Supplementary Information for

### What causes tumbling of *altro- $\alpha$ -CD* derivatives? Insight from computer simulations

Ying Liu,<sup>ab</sup> Christophe Chipot,<sup>cde</sup> Xueguang Shao,<sup>ab</sup> and Wensheng Cai<sup>\*a</sup>

<sup>a</sup>College of Chemistry, Research Center for Analytical Sciences, Tianjin Key Laboratory of Molecular Recognition and Biosensing, Collaborative Innovation Center of Chemical Science and Engineering, Nankai University, Tianjin 300071, People's Republic of China

<sup>b</sup>State Key Laboratory of Medicinal Chemical Biology, Nankai University, Tianjin, 300071, People's Republic of China

<sup>c</sup>Laboratoire International Associé Centre National de la Recherche Scientifique et University of Illinois at Urbana-Champaign, Unité Mixte de Recherche No. 7565, Université de Lorraine, B.P. 70239, 54506 Vandœuvre-lès-Nancy cedex, France

<sup>d</sup>Theoretical and Computational Biophysics Group, Beckman Institute, University of Illinois at Urbana-Champaign, Urbana, Illinois 61801, United States

<sup>e</sup>Department of Physics, University of Illinois at Urbana-Champaign, 1110 West Green Street, Urbana, Illinois 61801, United States

---

\* Address correspondence to [wscai@nankai.edu.cn](mailto:wscai@nankai.edu.cn).

**Physical origins of the free-energy barriers.** There are several common factors contributing to the free-energy barriers in water and in DMSO, including (1) the inevitable isomerization of the altropyranose unit and of its two neighboring glucopyranose units, (2) the deformation of the CD, (3) the desolvation of the side chain, (4) breaking hydrogen bonds at the secondary side of the CD, and (5) the unfavorable interaction of the hydroxyl groups of the altropyranose unit with the hydrophobic cavity. The latter two factors also constitute the main barrier in the tumbling of the altropyranose unit of a mono-*altro*- $\alpha$ -CD, as was reported previously.<sup>1</sup> Fig. 5 shows the conformational transition of the altropyranose unit of the alkyl *altro*- $\alpha$ -CD during tumbling. The free-energy barrier for the interconversion between the chair and the boat conformers is an integral part of the activation free energy. The deformation of the CD during tumbling was estimated by monitoring the distance root mean square deviation (RMSD) over the six glycosidic oxygen atoms of the CD with respect to their initial positions, as shown in Fig. S1. The deformation of the CD leads to the increase of its structural energy, and, thus, contributes to the free-energy barrier.

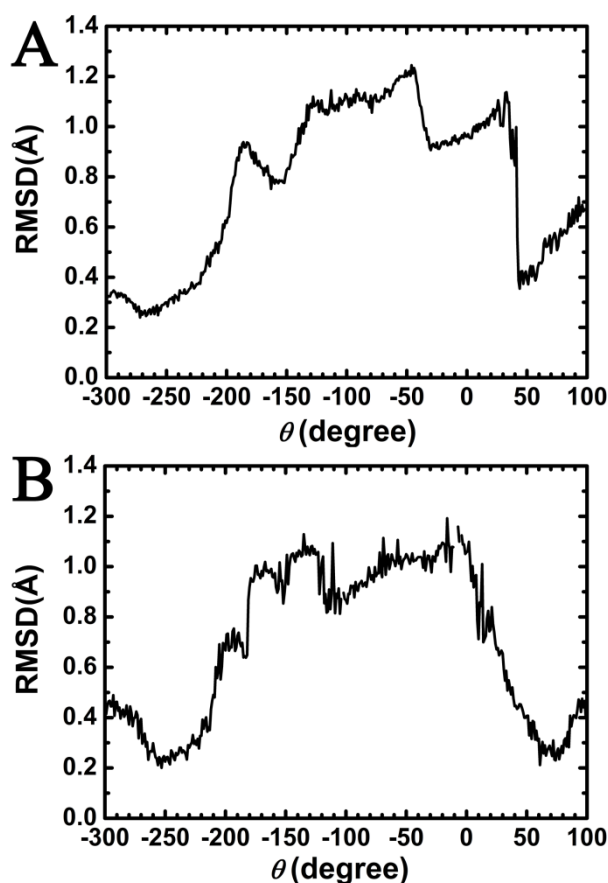

Fig. S1 Evolution of the distance root mean square deviation (RMSD) over the six glycosidic oxygen atoms of CD with respect to their equilibrium position in (A) water, and in (B) DMSO.

**Steric constraints of the polyvinyl alcohol chain.** In order to evaluate the steric hindrance of the polyvinyl alcohol chain, the chain-CD interaction was computed and further decomposed into van der Waals and electrostatics contributions. As shown in Fig. S2, the slight rise of the chain-CD (vdw) component stems from steric hindrances rooted in the inclusion of the polyvinyl alcohol chain into CD cavity. However, the chain-CD (vdw) term is compensated by the chain-CD (elec) term, resulting in the overall favorable chain-CD interaction. The steric constraints of the hydroxyl groups of the polyvinyl alcohol chain, therefore, have little bearing on the stability of the self-included polyvinyl alcohol *altro- $\alpha$ -CD*.

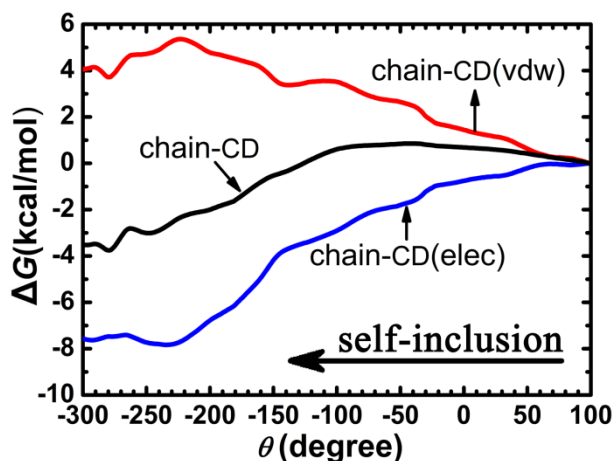

Fig. S2 Interaction of the polyvinyl alcohol chain with the *altro- $\alpha$* -CD.

**Stable binding of DMSO molecules to the CD.** To estimate the binding affinity of DMSO molecules to the CD, the free-energy profiles characterizing the reversible unbinding of a DMSO molecule from each rim of an *altro- $\alpha$* -CD were determined and are depicted in Fig. S3. The transition coordinate,  $\zeta$ , was defined as the projection onto the z-axis of the distance between the center of mass of a DMSO molecule and that of the CD glycosidic oxygen atoms. As can be observed, the minima at +2.6 Å (see Fig. S3A) and -2.8 Å (see Fig. S3B) suggest that each rim of the *altro- $\alpha$* -CD can bind a DMSO molecule. The stable binding of DMSO molecules to the CD entails a lower mobility of the former, hindering the tumbling of the altropyranose unit and penetration of the chain into the cavity.

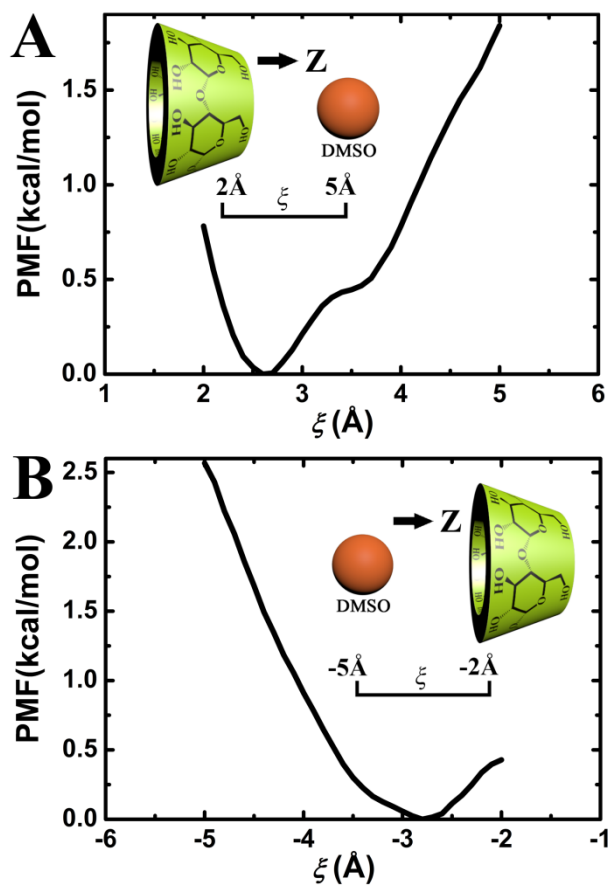

Fig. S3 Free-energy profiles characterizing the reversible unbinding of a DMSO molecule from (A) the primary rim and (B) the secondary rim of an *altro*- $\alpha$ -CD.

**References:**

1 Y. Liu, C. Chipot, X. G. Shao and W. S. Cai, J. Phys. Chem. C, 2014, 118, 19380–19386.
